# Supplementary material
Source: PubMed Central journal article supplement (PMC3411988)
Supplement: 1204800109_sapp.pdf [file 1204800109_sapp.pdf]

## Supplementary Information for Martin *et al.*,

### Diversification of complex butterfly wing patterns by repeated regulatory evolution of a *Wnt* ligand

SI Figures S1-5

SI Tables S1-5

SI Methods

SI References

#### Supplementary Figures

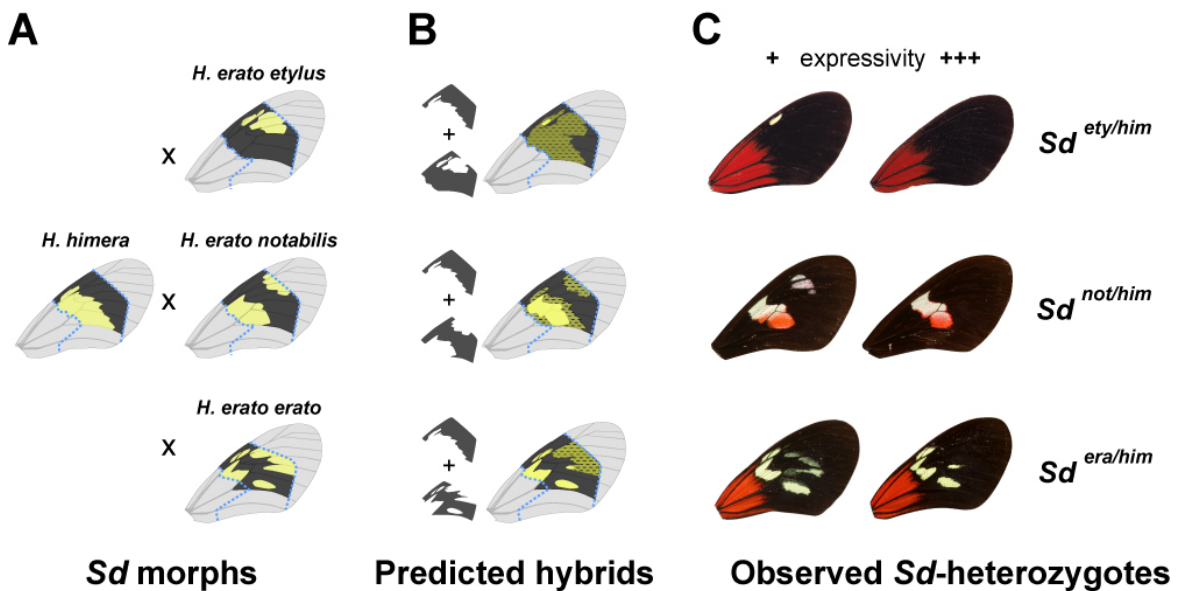

**Fig. S1** Additive effects of *Sd* variation in central forewing black patterns. (A) *Heliconius erato* x *H. himera* crosses between various *Sd* phenotypes. Black patterns and the corresponding light-colored pattern shapes were drawn by superimposition of wing pictures. (B) Apposition of the parental black patterns (as drawn in A) results in the predicted heterozygous *Sd* phenotypes under the hypothesis of additive black pattern variation. Stippled areas denote zones of non-overlap between the parental black patterns, *i.e.* zones where black color is inherited from a single parent (hemizygous state). (C) Spectrum of phenotypic variation observed in *Sd*-heterozygous phenotypes validates the

model of additive central black pattern (in *B*). Presence-absence of the yellow spot along the anterior wing margin (the R-spot) in *Sd*<sup>ety/him</sup> may be due to modifier loci (1). Also, the *H. himera* black pattern shows variable expressivity in the *notabilis* and *erato* backgrounds, as seen by color varying from back-peppered color (+) to pure black (+++) in fields at the *Sd*<sup>him/-</sup> hemizygous state.

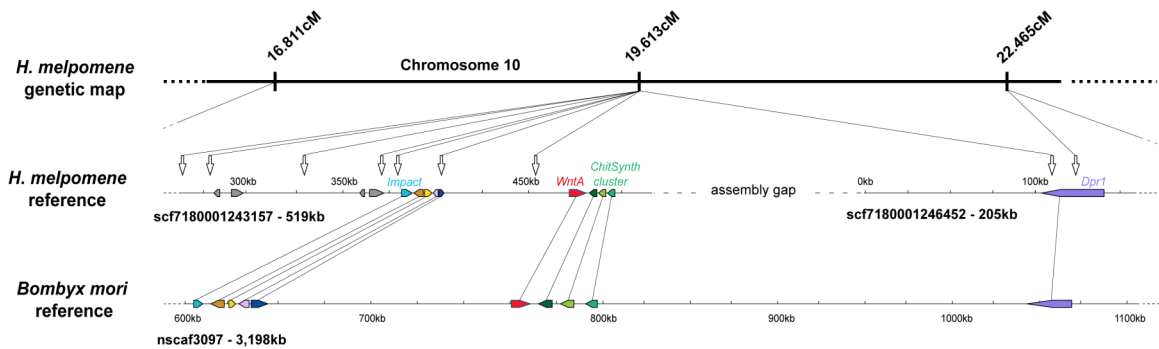

**Fig. S2** Contiguity of the *WntA* and *Dpr1* *Heliconius* genomic scaffolds and micro-synteny with the silkworm genome. The *Heliconius WntA* and *Dpr1* scaffolds are separated by an assembly gap but are directly contiguous on the *H. melpomene* genetic map, as their respective halves cover markers (white arrows) that co-localize at position 19.613cM of chromosome 10 (2). Colinearity of the *Impact-Dpr1* syntenic block with the silkworm genome assembly (3) provides independent evidence of contiguity between the two scaffolds, and suggests that the *ChitSynth – Dpr1* interval is devoid of genes. Genomic coordinates are provided in Table S4. Scaffolds *scf180001243157* and *scf7180001246452* can be accessed on Genbank (accession numbers HE668478 and HE669520) and via the *Heliconius* Genome Project Browser.

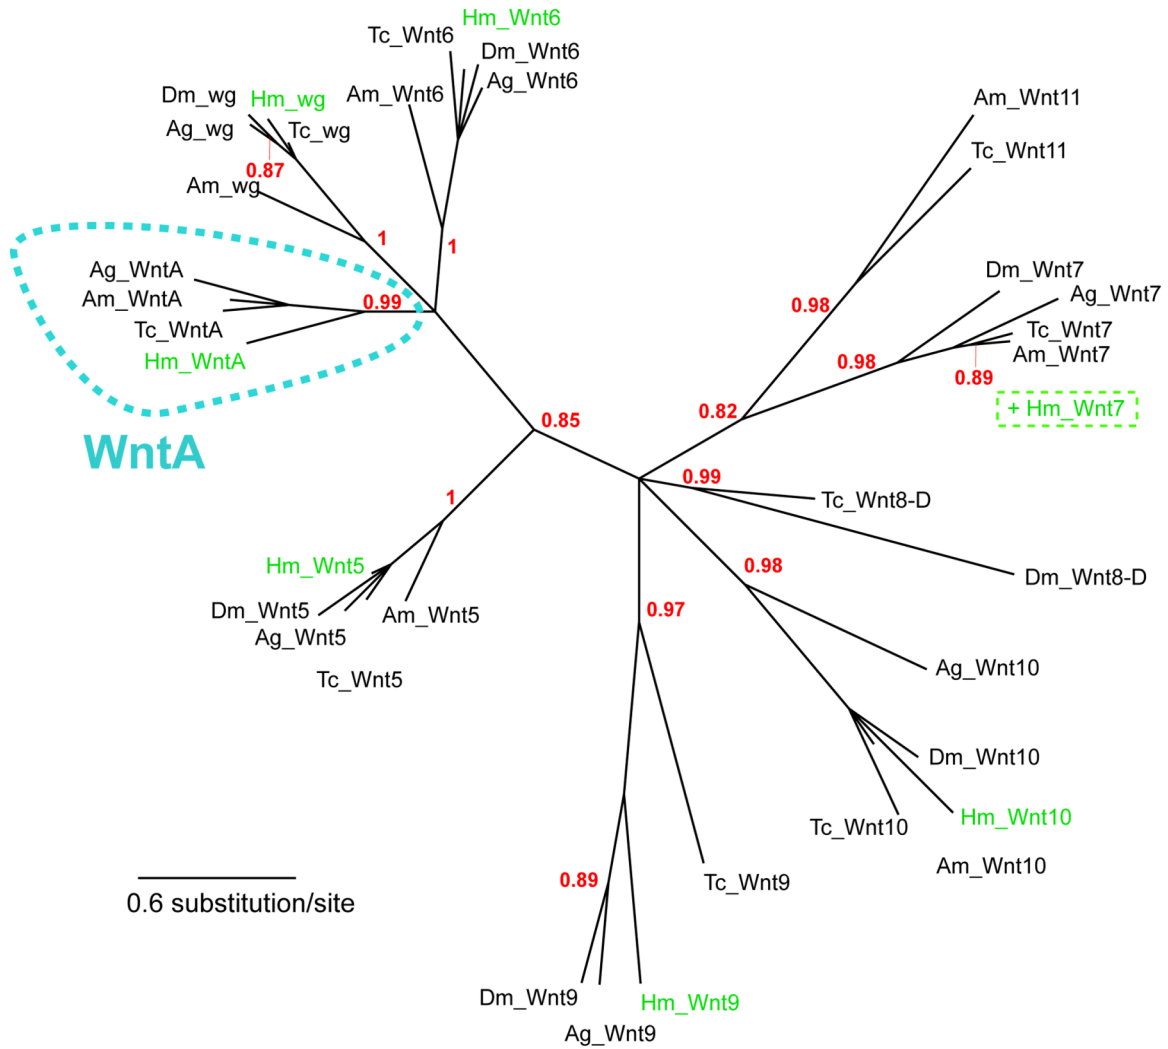

**Fig. S3** Phylogenetic relationships of insect Wnt ligands and annotation of *H. melpomene* Wnt proteins. While a *Wnt7* orthologue is present in the *H. melpomene* genome, it was not included in the phylogenetic analysis because of its missing first exon (assembly gap). Note the loss of *WntA* in *Drosophila*. Bootstrap values superior to 0.80 are indicated at the corresponding nodes. Species and accession numbers are as follows. *Anopheles gambiae* : Ag\_wg (XM\_553580.3), Ag\_Wnt5 (XM\_319487.4), Ag\_Wnt6 (XM\_318816.4), Ag\_Wnt7 (XM\_001238161.2), Ag\_Wnt9 (XM\_318818.4), Ag\_Wnt10 (XM\_318815.4), Ag\_WntA (XM\_557821.3), *Apis mellifera* : Am\_wg (XM\_396946.3), Am\_Wnt5 (XM\_397473.2), Am\_Wnt6 (XM\_396945.3), Am\_Wnt7 (XM\_395388.4), Am\_Wnt10 (XM\_396944.3), Am\_Wnt11 (XM\_001121348.1), Am\_WntA (XP\_624751.3); *Drosophila melanogaster* : Dm\_wg (NM\_078778.3), Dm\_Wnt5 (NM\_057576.3), Dm\_Wnt6 (NM\_135264.2), Dm\_Wnt7 (NM\_057462.3), Dm\_Wnt8-D

(NM\_142015.2), Dm\_Wnt9 (NM\_057624.2), Dm\_Wnt10 (NM\_135265.2); *Heliconius melpomene* : Hm\_wg (HMEL011440), Hm\_Wnt5 (HMEL007382), Hm\_Wnt6 (HMEL011436), Hm\_Wnt7 (HMEL004238, partial), Hm\_Wnt9 (HMEL011441), Hm\_Wnt10 (HMEL011434), Hm\_WntA (JN944582); *Tribolium castaneum* : Tc\_wg (NM\_001114350.1), Tc\_Wnt5 (XM\_969591.1), Tc\_Wnt6 (XM\_962962.2), Tc\_Wnt7 (XM\_968066.1), Tc\_Wnt8-D (XM\_966346.1), Tc\_Wnt9 (XM\_962805.1), Tc\_Wnt10 (XM\_963117.2), Tc\_Wnt11 (XM\_964168.1), Tc\_WntA (EFA07513.1).

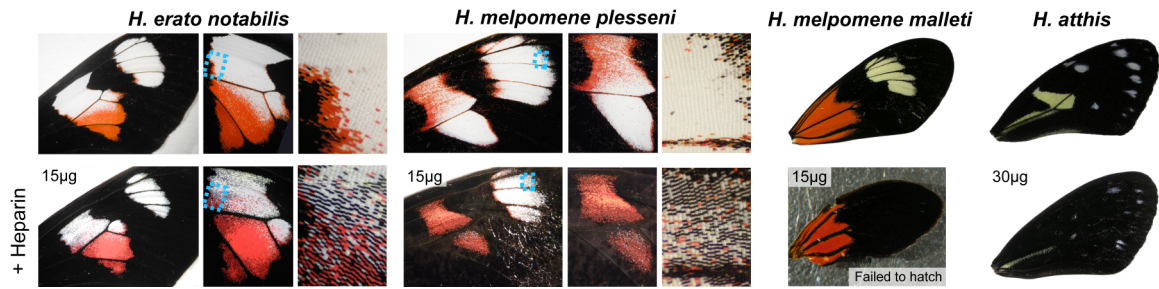

**Fig. S4** Heparin injections result in black-pattern specific expansions (additional data). See Fig. 2C-D and Main Text for details.

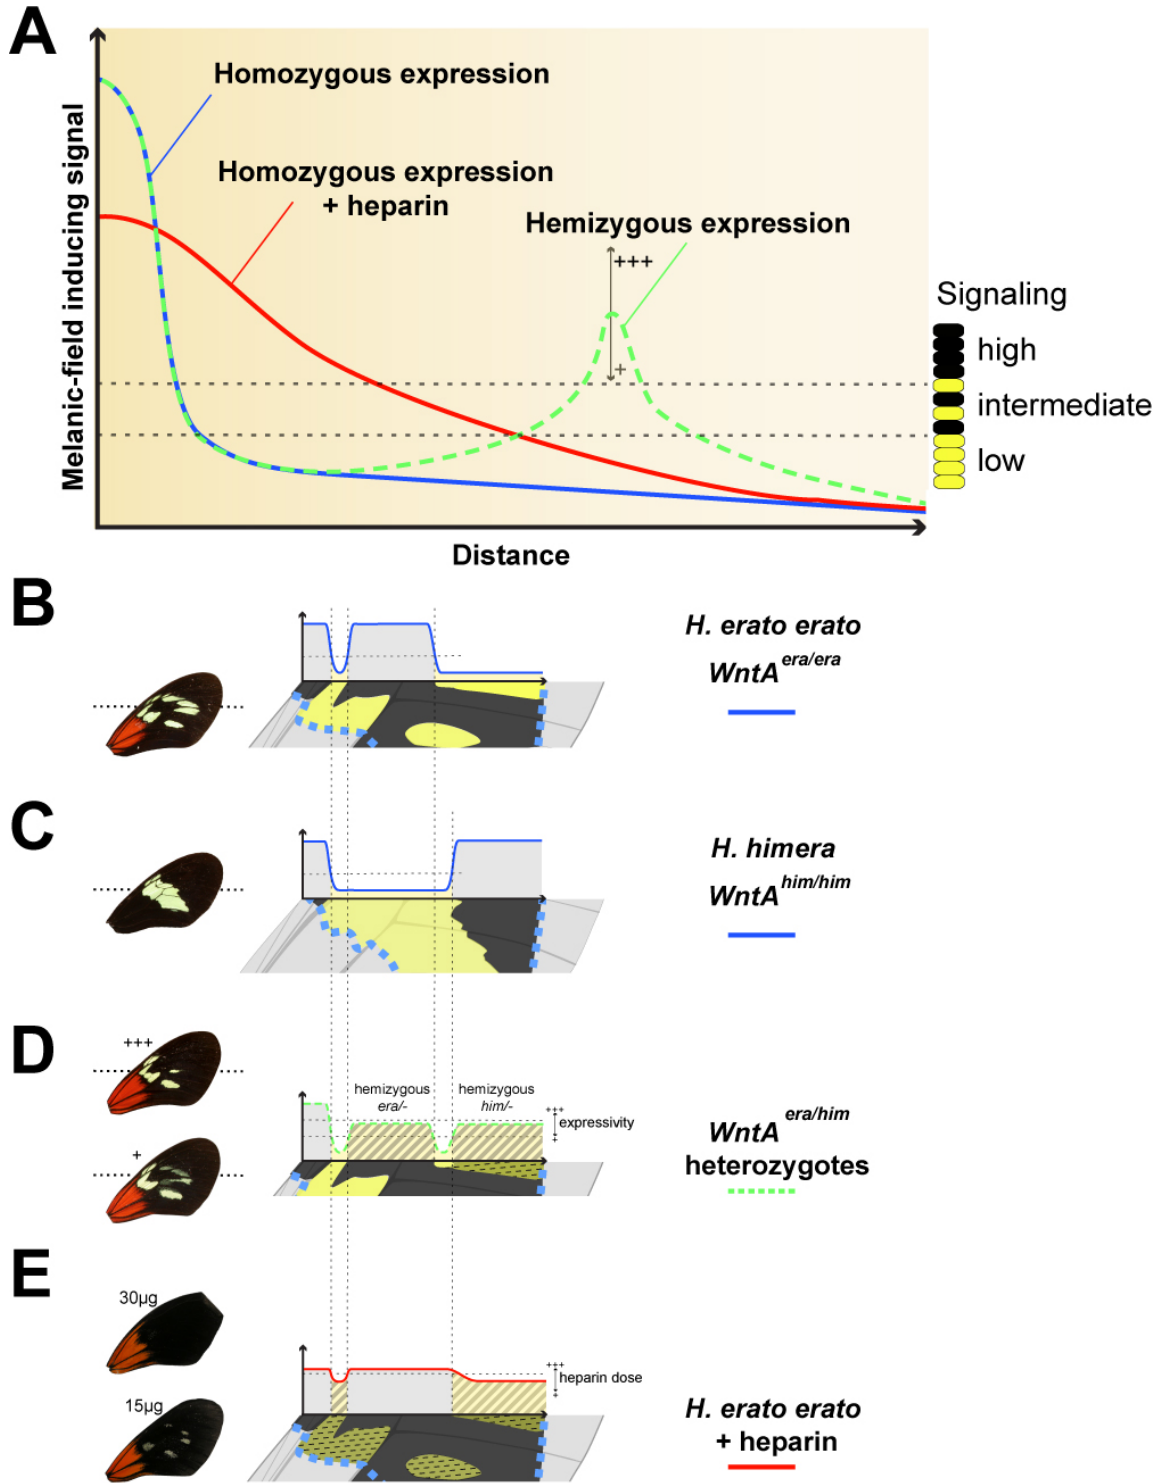

**Fig. S5** A heparin-sensitive signal induces black patterns. (A) One-dimensional, schematic representation of the distribution gradient of a putative diffusible black pattern inducer or morphogen expressed as a focal source in a naturally-occurring butterfly (*blue*

*line*). *Green line*: hybrid (heterozygous) patterns are expected to result in local peaks of normal expression where the parental black patterns overlap, as well as in domains expressing hemizygous levels of the diffusible factor where black patterns are parent-specific. *Red line*: heparin injections are expected to increase ligand diffusivity and stability (see Main Text), therefore spreading the distribution gradient. Both hybrid crosses and heparin injections may result in increased signaling at the wing-wide level and reveal an intermediate signaling state by interfering with the spatial dynamics of the gradient. (B-E) Extension of the working model to one-dimension wing transects. (B) *H. erato erato* wild-type forewing; (C) *H. himera* wild-type forewing; (d) *WntA<sup>era/him</sup>* individuals generated from a F2 cross. All the genotyped *WntA<sup>era/him</sup>* individuals show zones of variable melanic pattern expressivity (peppered yellow to pure black ; Fig. S1) that correspond to pattern positions that are only present in *H. himera* (stippled yellow); (E) Heparin-injected *H. erato erato* with dose-dependent melanization of the yellow patterns (peppered yellow to pure black). *WntA*-heterozygosity and heparin dose-dependent effects can be explained by a spread of the melanic field inducer, and are consistent with a role of *WntA* in black pattern induction.

## Supplementary Tables

**Table S1 | Candidate *H. melpomene* genome scaffolds after RAD mapping**

| <i>H. melpomene</i> scaffold <sup>a</sup> -<br>GenBank accession number | <i>H.erato</i> SNP<br>position(s) on<br>scaffold | Piled-up <i>H.erato</i><br>SNP count<br>(coverage) |  |          |  |          |
|-------------------------------------------------------------------------|--------------------------------------------------|----------------------------------------------------|-------------------------------------------------------------------------------------|----------|-------------------------------------------------------------------------------------|----------|
|                                                                         |                                                  |                                                    | allele 1                                                                            | allele 2 | allele 1                                                                            | allele 2 |
| <b>scf7180001243157<sup>b</sup> (<i>WntA</i>) -<br/>HE668478</b>        | 11440                                            | 70                                                 | 39                                                                                  | 0        | 0                                                                                   | 31       |
|                                                                         | 46372                                            | 97                                                 | 0                                                                                   | 25       | 72                                                                                  | 0        |
|                                                                         | 208013-208019                                    | 53                                                 | 0                                                                                   | 22-23    | 30-31                                                                               | 0        |
|                                                                         | 383321                                           | 55                                                 | 0                                                                                   | 23       | 32                                                                                  | 0        |
|                                                                         | 487893                                           | 82                                                 | 45                                                                                  | 0        | 0                                                                                   | 37       |
| scf7180001249804 - HE670851                                             | 296944                                           | 61                                                 | 44                                                                                  | 0        | 0                                                                                   | 17       |
|                                                                         | 531087-531118                                    | 62                                                 | 43-45                                                                               | 0        | 0                                                                                   | 19       |
| scf7180001250214 - HE671162                                             | 45200-45209                                      | 55-56                                              | 29-30                                                                               | 0        | 0                                                                                   | 26       |
|                                                                         | 57584                                            | 59                                                 | 35                                                                                  | 0        | 0                                                                                   | 24       |
| scf7180001246279 - HE669460                                             | 236440                                           | 59                                                 | 35                                                                                  | 0        | 0                                                                                   | 24       |
| scf7180001249002 - HE670311                                             | 145575-145598                                    | 204-205                                            | 145-146                                                                             | 0        | 0                                                                                   | 59       |
| scf7180001249397 - HE670566                                             | 48427                                            | 78                                                 | 53                                                                                  | 0        | 0                                                                                   | 25       |
| scf7180001249723 - HE670792                                             | 146780                                           | 56                                                 | 34                                                                                  | 0        | 0                                                                                   | 22       |
| scf7180001249836 - HE670875                                             | 60158                                            | 196                                                | 108                                                                                 | 0        | 0                                                                                   | 88       |
| scf7180001250713 - HE671542                                             | 223441                                           | 110                                                | 82                                                                                  | 0        | 0                                                                                   | 28       |

<sup>a</sup> SNPs with a perfect association to phenotype and coverage >50X (>1X per individual) are shown.

Nine scaffolds show SNPs with this level of stringency.

<sup>b</sup> The *WntA* scaffold shows the highest number of independently associated positions

and was retained for further fine-mapping.

Table S2 | *Sd* and *Ac* fine-mapping markers

***Sd*-linked markers in the *H. himera* x *H. erato* F2 crosses**

| Locus                  | Primer orientation on transcript | Primer sequence (5'>3')   | Position <sup>a</sup> on <i>H. melpomene</i> scf7180001243157 | Genotyping method              |
|------------------------|----------------------------------|---------------------------|---------------------------------------------------------------|--------------------------------|
| <i>Cpg24</i>           | forward                          | TCAAGGTCCACGTTGACAAG      | 296935 (+)                                                    | Sequencing with forward primer |
|                        | reverse                          | GGGTAGGGGACCTCTTTGAC      | 297454 (-)                                                    |                                |
| <i>JHEBP-Mat1</i>      | forward                          | CAGTCTTGACAAGTCGCACA      | 402431 (-)                                                    | Amplicon length polymorphism   |
|                        | reverse                          | AGGTGGAGGTCTCCAGTTT       | 401029 (+)                                                    |                                |
|                        | forward                          | CGGGGACGTTTTAGACAGC       | 403101 (+)                                                    | Sequencing with forward primer |
|                        | reverse                          | TGCAAAATCCTCCTCTTTT       | 403621 (-)                                                    |                                |
| <i>intergenic428kb</i> | NA <sup>b</sup>                  | TGATCTAATTAGTATGGTTCGTTGC | 427670 (+)                                                    | Sequencing with forward primer |
|                        | NA <sup>b</sup>                  | TCATCTGTTTTAAGTGAATCTATCG | 428043 (-)                                                    |                                |
| <i>WntA</i>            | forward                          | TCAGCACAGCGAAGAGTATG      | 450192(+)                                                     | Sequencing with forward primer |
|                        | reverse                          | TTGTCATTTGAACGACTAATGTG   | 450788 (-)                                                    |                                |
|                        | forward                          | CGTAAACAACGCGAAGACAA      | 473545 (+)                                                    | Sequencing with forward primer |
|                        | reverse                          | GAACTGGCCGTACTGGTGTT      | 474310 (-)                                                    |                                |
|                        | forward                          | CAGGCGGTACGTGGTCGT        | 481158 (+)                                                    | Sequencing with forward primer |
|                        | reverse                          | CGGCTCACAATAGTCCGGG       | 482177 (-)                                                    |                                |
| <i>Chitsynth1</i>      | forward                          | TGAGCGAATTCAACGATCAG      | 488191 (-)                                                    | Sequencing with forward primer |
|                        | reverse                          | GTCGTATCAGGTGGGCTAT       | 487830 (+)                                                    |                                |
| <i>Chitsynth3</i>      | forward                          | TGAGTTGGCCTACAACCTCG      | 497150 (-)                                                    | Sequencing with forward primer |
|                        | reverse                          | GCTCTGCTAGCTGCTGGA        | 496604 (+)                                                    |                                |
| <i>Dpr1</i>            | forward                          | AGATCTTACATATTAACAGCCG    | NA                                                            | Sequencing with reverse primer |
|                        | reverse                          | CCAAGTCCAACTGAAAATG       | NA                                                            |                                |

***Ac*-linked markers in the *H. melpomene malleti* x *H. melpomene melpomene* F2 cross**

| Locus             | Primer orientation on transcript | Primer sequence (5'>3')     | Position <sup>a</sup> on <i>H. melpomene</i> scf7180001243157 | Genotyping method (enzyme)                    |
|-------------------|----------------------------------|-----------------------------|---------------------------------------------------------------|-----------------------------------------------|
| <i>Cpg24</i>      | forward                          | TCAAGGTCCACGTTGACAAG        | 296935 (+)                                                    | Sequencing with forward primer                |
|                   | reverse                          | GGGTAGGGGACCTCTTTGAC        | 297454 (-)                                                    |                                               |
| <i>Mat1</i>       | forward                          | TGTCCAGAATGTAATGTACCACTGCGA | 403487 (+)                                                    | Restriction fragment length ( <i>Sau3AI</i> ) |
|                   | reverse                          | TCCTTGGCATCCCCTTCAGCGA      | 404259 (-)                                                    |                                               |
| <i>Chitsynth3</i> | forward                          | CCTTCGACGATGGTGTAAACGTGCAAA | 497654 (-)                                                    | Restriction fragment length ( <i>BstBI</i> )  |
|                   | reverse                          | AGGCACTGGGGCAAGGTGGC        | 497048 (+)                                                    |                                               |

<<< *WntA*

***Ac*-linked markers in the *H. cydno galanthus* x *H. pachinus* F2 cross and *H. cydno alithea* male-informative backcrosses**

| Locus             | Primer orientation on transcript | Primer sequence (5'>3') | Position <sup>a</sup> on <i>H. melpomene</i> scf7180001243157 | Genotyping method              |
|-------------------|----------------------------------|-------------------------|---------------------------------------------------------------|--------------------------------|
| <i>Cpg24</i>      | forward                          | TCAAGGTCCACGTTGACAAG    | 296935 (+)                                                    | Sequencing with forward primer |
|                   | reverse                          | GGGTAGGGGACCTCTTTGAC    | 297454 (-)                                                    |                                |
| <i>WntA</i>       | forward                          | CAGGCGGTACGTGGTCGT      | 481158 (+)                                                    | Sequencing with forward primer |
|                   | reverse                          | CGGCTCACAATAGTCCGGG     | 482177 (-)                                                    |                                |
| <i>Chitsynth3</i> | forward                          | TGAGTTGGCCTACAACCTCG    | 497150 (-)                                                    | Sequencing with forward primer |
|                   | reverse                          | GCTCTGCTAGCTGCTGGA      | 496604 (+)                                                    |                                |
| <i>Dpr1</i>       | forward                          | AGATCTTACATATTAACAGCCG  | NA                                                            | Sequencing with reverse primer |
|                   | reverse                          | CCAAGTCCAACTGAAAATG     | NA                                                            |                                |

<sup>a</sup> 5'-ends of primers are positioned on the *H. melpomene* reference scaffold scf7180001243157 for comparison between species

NA: not applicable



Table S3 | *Sd* and *Ac* fine-mapping results

*Sd* fine-mapping in the *H. himera* x *H. erato* F2 crosses

| Locus                  | Position <sup>a</sup> on <i>H. melpomene</i><br><i>scf7180001243157</i> | F2 recombinants (informative individuals) in <i>H. himera</i> x |                           |                       | Total - without inferred genotypes | Total - with inferred genotypes |
|------------------------|-------------------------------------------------------------------------|-----------------------------------------------------------------|---------------------------|-----------------------|------------------------------------|---------------------------------|
|                        |                                                                         | <i>H. erato etylus</i>                                          | <i>H. erato notabilis</i> | <i>H. erato erato</i> |                                    |                                 |
| <b>Cpg24</b>           | 296935 (+)<br>297454 (-)                                                | <b>2</b> (257)                                                  | <b>0</b> (91)             | NT <sup>c</sup>       | <b>2</b> (348)                     | <b>2</b> (348)                  |
| <b>JHEBP-Mat1</b>      | 402431 (-)                                                              | <b>2</b> (257)                                                  | 0 <sup>b</sup>            | NT <sup>c</sup>       | <b>2</b> (257)                     | <b>2</b> (348)                  |
|                        | 401029 (+)                                                              | non-informative                                                 | <b>0</b> (91)             | NT <sup>c</sup>       | <b>0</b> (91)                      |                                 |
|                        | 403101 (+)                                                              |                                                                 |                           |                       |                                    |                                 |
|                        | 403621 (-)                                                              |                                                                 |                           |                       |                                    |                                 |
| <b>intergenic428kb</b> | 427670 (+)                                                              | <b>1</b> (257)                                                  | <b>0</b> (91)             | NT <sup>c</sup>       | <b>1</b> (348)                     | <b>1</b> (348)                  |
|                        | 428043 (-)                                                              | non-informative                                                 | <b>0</b> (91)             | NT <sup>c</sup>       | <b>0</b> (458)                     | <b>0</b> (458)                  |
| 450192(+)              |                                                                         |                                                                 |                           |                       |                                    |                                 |
| 450188 (+)             |                                                                         |                                                                 |                           |                       |                                    |                                 |
| 473545 (+)             |                                                                         |                                                                 |                           |                       |                                    |                                 |
| 474310 (-)             |                                                                         |                                                                 |                           |                       |                                    |                                 |
| 481158 (+)             |                                                                         |                                                                 |                           |                       |                                    |                                 |
| <b>WntA</b>            | 482177 (-)                                                              | non-informative                                                 | <b>0</b> (91)             | NT <sup>c</sup>       | <b>0</b> (107)                     | <b>0</b> (107)                  |
|                        | 488191 (-)                                                              |                                                                 |                           |                       |                                    |                                 |
| <b>Chitsynth1</b>      | 487830 (+)                                                              | <b>0</b> (257)                                                  | <b>0</b> (91)             | NT <sup>c</sup>       | <b>0</b> (348)                     | <b>0</b> (348)                  |
|                        | 497150 (-)                                                              | <b>0</b> (257)                                                  | <b>1</b> (91)             | NT <sup>c</sup>       | <b>1</b> (348)                     | <b>1</b> (348)                  |
| 496604 (+)             |                                                                         |                                                                 |                           |                       |                                    |                                 |
| <b>Dpr1</b>            | NA<br>NA                                                                | <b>7</b> (311)                                                  | NT <sup>c</sup>           | NT <sup>c</sup>       | <b>7</b> (311)                     | <b>7</b> (311)                  |

*Ac* fine-mapping in the *H. melpomene malleti* x *H. melpomene melpomene* F2 cross

| Locus             | Position <sup>a</sup> on <i>H. melpomene</i><br><i>scf7180001243157</i> | F2 recombinants (informative individuals) |
|-------------------|-------------------------------------------------------------------------|-------------------------------------------|
| <b>Cpg24</b>      | 296935 (+)<br>297454 (-)                                                | <b>2</b> (51)                             |
| <b>Mat1</b>       | 403487 (+)                                                              | <b>0</b> (51)                             |
|                   | 404259 (-)                                                              |                                           |
| <b>Chitsynth3</b> | 497654 (-)                                                              | <b>0</b> (51)                             |
|                   | 497048 (+)                                                              |                                           |

<<< **WntA**

*Ac* fine-mapping in the *H. cydno galanthus* x *H. pachinus* F2 cross and x *H. cydno alithea* male-informative backcrosses

| Locus             | Position <sup>a</sup> on <i>H. melpomene</i><br><i>scf7180001243157</i> | Recombinants (informative individuals) in <i>H. c. galanthus</i> x |                      |                |
|-------------------|-------------------------------------------------------------------------|--------------------------------------------------------------------|----------------------|----------------|
|                   |                                                                         | <i>H. pachinus</i>                                                 | <i>H. c. alithea</i> | Total          |
| <b>Cpg24</b>      | 296935 (+)                                                              | <b>0</b> (65)                                                      | <b>0</b> (64)        | <b>0</b> (129) |
|                   | 297454 (-)                                                              |                                                                    |                      |                |
| <b>WntA</b>       | 481158 (+)                                                              | <b>0</b> (65)                                                      | <b>0</b> (64)        | <b>0</b> (129) |
|                   | 482177 (-)                                                              |                                                                    |                      |                |
| <b>Chitsynth3</b> | 497150 (-)                                                              | <b>0</b> (65)                                                      | <b>0</b> (64)        | <b>0</b> (129) |
|                   | 496604 (+)                                                              |                                                                    |                      |                |
| <b>Dpr1</b>       | NA                                                                      | <b>1</b> (28)                                                      | <b>1</b> (55)        | <b>2</b> (83)  |
|                   | NA                                                                      |                                                                    |                      |                |

<sup>a</sup> 5'-ends of primers are positioned on the *H. melpomene* reference scaffold scf7180001243157 for comparison between species

<sup>b</sup> Absence of recombination between two perfectly associated markers was inferred for three markers in the *himera* x *notabilis* brood

<sup>c</sup> NT : not tested

**Table S4 | Gene annotations in the *Ac* and *Sd* intervals**

| Genetic interval | Gene ID                              | Range <sup>a</sup> (bp) | Strand <sup>a</sup> | <i>Bombyx</i> orthologue ; Range (strand) on <i>nscf3097</i> (SilkDB) | NCBI BLASTP hit - accession [ <i>species</i> ]                                                                | E-value | Annotated molecular function                                               |
|------------------|--------------------------------------|-------------------------|---------------------|-----------------------------------------------------------------------|---------------------------------------------------------------------------------------------------------------|---------|----------------------------------------------------------------------------|
| -                | <b><i>Cpg24</i></b>                  | 292749-297843           | +                   | (BGIBMGA13899 ; <i>nscf3099</i> )                                     | Cuticular protein glycin-rich CPG24 - BAG30722 [ <i>Papilio xuthus</i> ]                                      | 5E-170  | Unknown                                                                    |
| [Ac]             | <b>Conserved transcript FY037235</b> | 362202-362832           | -                   | no hit                                                                | no hit                                                                                                        | -       | Unknown                                                                    |
| [Ac]             | <b><i>Poxn</i></b>                   | 365755-380944           | +                   | (unannotated ; <i>nscf3099</i> )                                      | Pox neuro - NP_476686 [ <i>Drosophila melanogaster</i> ]                                                      | 5E-69   | Paired-box family transcription factor - various developmental processes   |
| [Ac]             | <b><i>Impact</i></b>                 | 385746-390167           | +                   | BGIBMGA013784 ; 605260-609383 (+)                                     | Imprinted and ancient (Impact) protein - BAE23558 [ <i>Mus musculus</i> ]                                     | 7E-77   | Unknown - discovered as a conserved imprinted locus in mammals             |
| [Ac]             | <b><i>Mus312</i></b>                 | 391110-398225           | -                   | BGIBMGA013759 ; 614135-620461 (-)                                     | Mutagen-sensitive 312 - NP_648104 [ <i>Drosophila melanogaster</i> ]                                          | 2E-24   | DNA repair and recombination                                               |
| [Ac]             | <b><i>Maltp1</i></b>                 | 396876-400472           | +                   | unannotated ; 621003-623852 (+)                                       | Mucosa-associated lymphoid tissue lymphoma translocation protein 1 (Maltp1) NP_776216 [ <i>Homo sapiens</i> ] | 3E-18   | Caspase-like - regulation of proteolysis and apoptosis                     |
| [Ac]             | <b><i>JHEBP</i></b>                  | 400264-402628           | -                   | unannotated ; 625729-628748 (-)                                       | Juvenile hormone esterase binding protein - AAD38067 [ <i>Manduca sexta</i> ]                                 | 5E-141  | Regulation of juvenile hormone activity                                    |
| [Ac]             | <b><i>Mat1</i></b>                   | 4003080-405490          | +                   | BGIBMGA13786 ; 635189-643724 (+)                                      | Menage-a-trois 1 protein (Mat1) - NP_610605 [ <i>Drosophila melanogaster</i> ]                                | 1E-85   | Basal transcription factor - RNA pol II-dependent transcription initiation |
| [Ac, Sd]         | <b><i>WntA</i></b>                   | 450400-483854           | +                   | BGIBMGA013787 ; 771657-781653 (+)                                     | (Fig. S3)                                                                                                     | -       | Secreted ligand of the Wnt-family - morphogenesis                          |
| [Ac, Sd]         | <b><i>ChitSynth1</i></b>             | 486270-489436           | -                   | BGIBMGA013758 ; 789788-792617 (-)                                     | Chitin deacetylase 5a - ADB43611 [ <i>Helicoverpa armigera</i> ]                                              | 4E-154  | Polysaccharide deacetylase - chitin biosynthesis                           |
| [Ac, Sd]         | <b><i>ChitSynth2</i></b>             | 490610-494251           | -                   | BGIBMGA013757 ; 797560-804535 (-)                                     | Chitin deacetylase 5a - ADB43611 [ <i>Helicoverpa armigera</i> ]                                              | 4E-157  | Polysaccharide deacetylase - chitin biosynthesis                           |
| [Ac]             | <b><i>ChitSynth3</i></b>             | 495897-498544           | -                   | BGIBMGA013756 ; 810851-816660 (-)                                     | Chitin deacetylase 5a - ADB43611 [ <i>Helicoverpa armigera</i> ]                                              | 0       | Polysaccharide deacetylase - chitin biosynthesis                           |
| -                | <b><i>Dpr1</i></b>                   | NA                      | -                   | BGIBMGA013755 ; 1042967-1066089 (-)                                   | Dpr1 - NP_995908 [ <i>Drosophila melanogaster</i> ]                                                           | 1E-63   | Sensory perception of salty taste                                          |

<sup>a</sup> relative to the *H. melpomene scf7180001243157* reference scaffold

**Table S5 | Pairwise comparisons of *Heliconius WntA* coding sequences**

| <b>dN/dS<sup>a</sup></b>       | <i>H. m. melpomene</i> [ac/ac] | <i>H. m. malleti</i> [Ac/Ac] | <i>H. c. galanthus</i> [ac/ac] | <i>H. c. alithea</i> [Ac/Ac] | <i>H. e. petiverana</i> | <i>H. e. lativitta</i> | <i>H. e. notabilis</i> | <i>H. himera</i> |
|--------------------------------|--------------------------------|------------------------------|--------------------------------|------------------------------|-------------------------|------------------------|------------------------|------------------|
|                                | <i>H. m. melpomene</i> [ac/ac] | 0                            |                                |                              |                         |                        |                        |                  |
| <i>H. m. malleti</i> [Ac/Ac]   | 0/14                           | 0                            |                                |                              |                         |                        |                        |                  |
| <i>H. c. galanthus</i> [ac/ac] | 0/8                            | 0/18                         | 0                              |                              |                         |                        |                        |                  |
| <i>H. c. alithea</i> [Ac/Ac]   | 0/10                           | 0/10                         | 0/18                           | 0                            |                         |                        |                        |                  |
| <i>H. e. petiverana</i>        | 6/45                           | 6/45                         | 6/42                           | 6/46                         | 0                       |                        |                        |                  |
| <i>H. e. lativitta</i>         | 4/39                           | 4/40                         | 4/39                           | 4/40                         | 2/12 <sup>b</sup>       | 0                      |                        |                  |
| <i>H. e. notabilis</i>         | 4/41                           | 4/42                         | 4/41                           | 4/42                         | 2/14 <sup>b</sup>       | 0/2                    | 0                      |                  |
| <i>H. himera</i>               | 8/40                           | 8/40                         | 8/40                           | 8/41                         | 2/11                    | 4/7                    | 4/5                    | 0                |

<sup>a</sup> The matrix features pairwise dN/dS ratios between *WntA* full-length coding sequences (885bp) of various species and morphs

<sup>b</sup> Both non-synonymous substitutions affect codon 233, resulting in a single Arg (*H. e. petiverana*) - Leu (*H. e. lativitta/notabilis*) amino-acid substitution

**yellow** : no amino-acid substitutions were observed between *H. melpomene* and *H. cydno* morphs of different Ac phenotypes

**red** : no amino-acid substitutions were observed between the parapatric

*H. e. lativitta* and *H. e. notabilis* morphs (Eastern Ecuador) of different Sd phenotypes

## SI Methods

### RAD mapping

Preparation of a RAD sequencing library followed a previous protocol (4) with the following adaptations. Genomic DNA from 25 *Sd*<sup>not/not</sup> and 25 *Sd*<sup>him/him</sup> F2 individuals from a single *H. himera* x *H. erato notabilis* family were combined equimolarly (50ng/individual) into two separate *Sd*<sup>not/not</sup> and *Sd*<sup>him/him</sup> DNA pools. Each pool was digested with the restriction enzyme *NcoI*, heat inactivated, and directly ligated to custom barcoded, Illumina Paired-End sequencing forward adapters (*Sd*<sup>him/him</sup> PE1 :5'-AATGATACGGCGACCACCGAGATCTACACTCTTTCCCTACACGACGCTCTTCCGATCT[CAGTA]G-3; 3'-TTACTATGCCGCTGGTGGCTCTAGATGTGAGAAAGGGATGTGCTGCGAGAAGGCTAGA[GTCAT]CGTACp-5'; *Sd*<sup>not/not</sup> PE1 : 5'-AATGATACGGCGACCACCGAGATCTACACTCTTTCCCTACACGACGCTCTTCCGATCT[CGTAG]G-3'; 3'-TTACTATGCCGCTGGTGGCTCTAGATGTGAGAAAGGGATGTGCTGCGAGAAGGCTAGA[GCATC]CGTACp-5' ; brackets denote five-nucleotide barcodes). The two barcoded samples were then mixed together, sheared to an average size of 400bp using a Covaris S220 shearer, size selected to 300-600bp by agarose gel extraction, and blunt ligated to a custom reverse adapter (PE2 : 5'-GTTCGTCTTCTGCCGTATGCTCTAGCCAGAGCCGTAAGGACGACTTGGCGAGAAGGCTAG\*A-3' ; 3'-ATCGTCACTCGGCATTCCTGCTGAACCGCTCTTCCGATCp-5' ; asterisk denotes a phosphorothiate bond modification). The resulting library was amplified by Touchdown PCR (18 cycles with denaturation at 98°C and extension at 72°C ; annealing step : 5 cycles at 65°C -1°C/cycle and 13 cycles at 60°C) using the high-fidelity Phusion Taq polymerase and custom amplification primers (PE1 : 5'-AATGATACGGCGACCACCG\*A-3' ; PE2 : 5'-CAAGCAGAAGACGGCATAACGA\*G-3' ; asterisks denote phosphorothiate bond modifications), gel extracted between 300-700bp, and sequenced on a single lane of an Illumina Genome Analyser GAIi generating 72bp Paired-End reads. Custom Perl scripts

were used to separate the resulting forward and reverse *.fastq* files into new *.fastq* files separated by barcode/pool. The resulting files were aligned to the reference assembly of the *H. melpomene* genome using MosaikAligner (version 1.0.1388) with the following relevant switches: *-hs 12 -mm 15 -a all -mhp 100 -act 30 -p 6 -bw 29 -m all*. We allowed for a large number of mismatches, as we were aligning to a reference genome from a related species, with an estimated divergence of time of 13-26 MY between the *erato/himera* and *melpomene* clades (5). We used the MosaikText command to generate an *.axt* file, followed by a custom Perl script to parse that file and generate a SNP table. To be considered valid a candidate SNP had to have a minimum pileup depth of 30, a minimum minor allele count of 5, and a minimum minor allele frequency of 5% , averaged over the two pools (6). Running the pipeline resulted in a SNP table containing 46,236 SNPs, each mapped to a *H. melpomene* scaffold, with minor and major allele counts in the two pools and a median coverage of 86X. The 2-plex barcoding design resulted in sequence bias, as we found a 3:2 ratio of  $Sa^{him/him} : Sa^{not/not}$  sequences. We identified SNPs closely linked to the wing-patterning element as those with a minimum coverage of 50X that were differentially fixed in the two pools. After this stringent treatment, only the *WntA* scaffold (*scf7180001243157*) showed more than two associated SNPs, including three SNP positions that escaped from sequence bias ( $Sa^{him/him} < Sa^{not/not}$  ; Table S1).

## Cloning

Full-length *WntA* coding sequences from *H. erato*, *H. himera*, *H. cydno* and *H. melpomene* morphs were amplified from wing cDNA first-strands using semi-nested PCR (first round Forward primer 5'-GCCAGTTCAAACGTCAAACA-3'; second round Forward primer 5'-CCTCGTTGAGAGACAGAAACA-3'; Reverse primer 5'-CTAGTTGCAGACGTGGTGGT-3') and directly sequenced on both strands. MEGA 3.0 was used for calculating pairwise dN/dS ratios(7). A 565bp fragment of the *WntA* coding region was amplified from *H. erato* wing cDNA first strands by PCR (Forward primer 5'-GGCGGTTGAAGAGTGTC AAT-3'; Reverse primer 5'-GTTGCAGACGTGGTGGTC-3'). A 565bp *H. erato erato* amplicon and a 885bp *H. cydno alithea* amplicon were then cloned in the pCRII vector (Invitrogen Corporation, Carlsbad, California, United States),

and used for antisense riboprobe synthesis with the DIG RNA labeling kit (Roche Applied Science, Indianapolis, Indiana, United States).

### ***In Situ* Hybridizations**

Fifth-instar larvae were anaesthetized in ice cold water and their wing disks dissected in Phosphate Buffer Solution (PBS), incubated in cold fixative (formaldehyde 9% in PBS containing 50 mM ethylene glycol tetraacetic acid) for 30-35 min, rinsed in PBS with 0.01% Tween20 (PBST), dehydrated with increasing concentrations of methanol and kept for long-term storage in methanol at -20°C. This sample preparation technique allowed transport from the place of tissue collection (Panama) to the molecular laboratory (USA), but is unsuitable for pupal wings during the 50hr that follow pupation, due to the fragility of the tissues. For *in situ* hybridization, wing disks preserved in methanol were rehydrated in increasing concentrations of cold PBST, washed in cold PBST, incubated 5 min with 25 µg/mL proteinase K in cold PBST, washed in cold PBST containing 2mg/mL glycine, washed in cold PBST and freed from their peripodial membrane using fine forceps. The tissues were then post-fixed 20min on ice in PBS containing 5.5% formaldehyde, washed in cold PBST, gradually transferred to a standard hybridization buffer (5X saline sodium citrate pH 4.5, 50% formamide, 0.01% Tween20, 100µg/mL denatured salmon sperm DNA, final pH 5-6 at 22°C), placed at 62°-65°C for an hour, incubated in hybridization buffer supplemented with 1 g/L glycine and 30-50 ng/mL riboprobe for 16-40h hr at 62°C, washed eight times 15-30 min in hybridization buffer, returned to room temperature, and gradually stepped back into, and washed in, PBST. For secondary detection of the riboprobe, the tissues were blocked for 30 min in Tris buffer saline, 0.01% Tween20 (TBST, pH=7.5) supplemented with 1 g/L bovine serum albumin, incubated with a 1:4000 dilution of anti-digoxigenin alkaline phosphatase F<sub>ab</sub> fragments (Roche Applied Science, Indianapolis, Indiana, United States), washed ten times (10-120 min per wash) in cold TBST, incubated in an alkaline phosphatase buffer (100 mM Tris-HCl pH 9.5, 100 mM NaCl, 5 mM MgCl<sub>2</sub>, 0.01% Tween20), and finally stained with BM Purple (Roche Applied Science) for 4-8hr at room temperature. Stained tissues were then washed in PBST 2 mM ethylene diamine tetraacetic acid and slide mounted in PBS

containing 60% glycerol. mRNA *in situ* hybridizations were photographed with a Nikon Coolpix P5100 digital camera (Nikon Inc. USA, Melville, New York, United States) mounted with a LNS- 30D/P51 adapter (Zarf Enterprises, Spokane, Washington, United States) on a Leica S4E microscope (Leica Microsystems, Buffalo Grove, Illinois, United States). All the presented results were replicated in at least three individuals per morph at informative stages.

## SI References

1. Kapan DD, Flanagan NS, Tobler A, Papa R, Reed RD, Gonzalez JA, Restrepo MR, Martinez L, Maldonado K, Ritschoff C, *et al.* (2006) Localization of Müllerian mimicry genes on a dense linkage map of *Heliconius erato*. *Genetics* 173: 735-757.
2. The Heliconius Genome Consortium (2012) A butterfly genome reveals promiscuous exchange of mimicry adaptations among species. *Nature* 487: 94-98.
3. Duan J, Li R, Cheng D, Fan W, Zha X, Cheng T, Wu Y, Wang J, Mita K, Xiang Z, *et al.* (2010) SilkDB v2.0: a platform for silkworm (*Bombyx mori*) genome biology. *Nucleic Acids Res* 38 (Database issue): D453-D456.
4. Etter PD, Bassham S, Hohenlohe PA, Johnson EA, & Cresko WA (2011) in *Molecular Methods for Evolutionary Genetics*, eds. Orgogozo V & Rockman MV (Humana Press, New York, NY).
5. Pohl N, Sison-Mangus MP, Yee EN, Liswi SW, & Briscoe AD (2009) Impact of duplicate gene copies on phylogenetic analysis and divergence time estimates in butterflies. *BMC Evol Biol* 9:99.
6. Burke MK, Dunham JP, Shahrestani P, Thornton KR, Rose MR, & Long AD (2010) Genome-wide analysis of a long-term evolution experiment with *Drosophila*. *Nature* 467: 587-590.
7. Kumar S, Tamura K, & Nei M (2004) MEGA3: Integrated software for Molecular Evolutionary Genetics Analysis and sequence alignment. *Brief Bioinform* 5: 150-163.
